# Supplementary material for: Low palaeoelevation of the northern Lhasa terrane during late Eocene: Fossil foraminifera and stable isotope evidence from the Gerze Basin
Source: PubMed Central journal article supplement (PMC4897749; doi:10.1038/srep27508), 2016-06-08
Supplement: srep27508-s1.pdf [file srep27508-s1.pdf]

# Supplementary Information

## **Low palaeoelevation of the northern Lhasa terrane during late Eocene: Fossil foraminifera and stable isotope evidence from the Gerze Basin**

Yi Wei<sup>1,2</sup>, Kexin Zhang<sup>1,2</sup>, Carmala N. Garzione<sup>3</sup>, Yadong Xu<sup>1,2</sup>, Bowen Song<sup>4</sup>, Junliang Ji<sup>1,2</sup>

<sup>1</sup> Faculty of Earth Sciences, China University of Geosciences (Wuhan), Wuhan, Hubei, China;

<sup>2</sup> State Key Laboratory of Biogeology and Environmental Geology, China University of Geosciences, Wuhan 430074, Hubei, China;

<sup>3</sup> Department of Earth and Environmental Sciences, University of Rochester, Rochester, NY, USA;

<sup>4</sup> Institute of Geological Survey, China University of Geosciences, Wuhan 430074, Hubei, China

\*corresponding: K.X.Z. ([kx\\_zhang@cug.edu.cn](mailto:kx_zhang@cug.edu.cn))

C.N.G. ([carmala.garzione@rochester.edu](mailto:carmala.garzione@rochester.edu))

### **Contents**

Part 1 Supplementary Table S1-3

Part 2 Supplementary Figure S1

**Supplementary Table S1 Paleomagnetism Data**

| Sample   | Ds    | Is    | MAD  | VGP      | Deep  |
|----------|-------|-------|------|----------|-------|
| S33-84-2 | 330.2 | 65.8  | 5.3  | 62.31211 | 320.0 |
| S33-84-1 | 302.2 | 64.0  | 6.9  | 43.96107 | 315.0 |
| S33-82-2 | 331.0 | 4.1   | 4.0  | 49.55051 | 306.4 |
| S33-81-1 | 285.2 | 62.3  | 2.8  | 31.71029 | 303.4 |
| S33-78-1 | 281.0 | 7.3   | 15.1 | 11.27032 | 288.8 |
| S33-77-1 | 293.5 | -61.4 | 1.8  | -6.1808  | 287.2 |
| S33-76-2 | 325.5 | 37.2  | 15.0 | 57.31352 | 281.5 |
| S33-75-3 | 38.2  | -68.5 | 8.1  | -0.12726 | 278.0 |
| S33-75-1 | 12.0  | 3.4   | 4.2  | 57.75174 | 276.8 |
| S33-71-2 | 296.5 | 20.1  | 5.5  | 27.88734 | 262.2 |
| S33-71-1 | 48.4  | 26.7  | 14.5 | 42.49385 | 262.1 |
| S33-70-2 | 157.2 | -72.0 | 12.5 | -60.4066 | 261.2 |
| S33-70-1 | 169.9 | -53.1 | 14.6 | -81.3316 | 261.0 |
| S33-69-1 | 226.5 | -57.9 | 14.8 | -51.8467 | 257.4 |
| S33-68-1 | 169.0 | -79.0 | 12.7 | -52.6076 | 253.6 |
| S33-66-2 | 236.0 | -68.4 | 21.7 | -45.1534 | 247.9 |
| S33-64-1 | 183.2 | -62.1 | 12.8 | -78.2656 | 238.0 |
| S33-62-3 | 254.6 | -87.2 | 4.8  | -33.2214 | 234.7 |
| S33-62-2 | 93.0  | 31.0  | 16.2 | 6.286065 | 234.3 |
| S33-61-3 | 280.8 | -3.7  | 11.9 | 8.15902  | 230.9 |
| S33-60-4 | 294.2 | -61.5 | 9.7  | -5.85253 | 226.2 |
| S33-60-2 | 20.5  | 46.7  | 12.4 | 71.82935 | 222.4 |
| S33-59-1 | 0.7   | 48.0  | 14.9 | 87.08069 | 219.0 |
| S33-56-5 | 277.2 | 73.2  | 10.5 | 30.48855 | 216.0 |
| S33-56-4 | 338.7 | 17.7  | 9.3  | 59.81052 | 215.5 |
| S33-56-3 | 42.8  | 12.4  | 5.7  | 42.60422 | 214.0 |
| S33-56-2 | 285.1 | -57.9 | 15.2 | -8.99967 | 213.0 |
| S33-55-1 | 359.5 | -0.2  | 4.3  | 57.9965  | 208.9 |
| S33-52-3 | 343.9 | 23.4  | 8.0  | 65.36454 | 203.0 |
| S33-52-2 | 69.6  | 3.6   | 9.4  | 18.20372 | 202.1 |
| S33-52-1 | 260.3 | -81.8 | 5.8  | -33.1877 | 200.3 |
| S33-51-1 | 228.1 | -32.7 | 7.7  | -44.5354 | 198.2 |
| S33-50-2 | 343.4 | -34.1 | 5.9  | 36.95483 | 197.5 |
| S33-45-3 | 16.3  | 10.9  | 4.4  | 59.51283 | 187.7 |
| S33-44-2 | 4.5   | 20.2  | 2.0  | 68.12455 | 182.4 |
| S33-44-1 | 0.2   | 10.0  | 4.8  | 63.13772 | 182.2 |
| S33-43-2 | 59.0  | 50.7  | 14.0 | 40.43738 | 176.4 |
| S33-43-1 | 359.5 | 4.0   | 5.3  | 60.09873 | 175.7 |
| S33-41-7 | 347.7 | 43.5  | 3.3  | 77.40425 | 174.1 |
| S33-41-5 | 18.3  | 31.4  | 6.3  | 67.69629 | 172.6 |
| S33-41-4 | 328.1 | 30.4  | 9.7  | 57.17792 | 172.1 |
| S33-41-3 | 296.0 | 18.8  | 6.8  | 27.10097 | 171.7 |

| Sample    | Ds    | Is    | MAD  | VGP      | Deep  |
|-----------|-------|-------|------|----------|-------|
| S33-41-1  | 4.6   | 11.1  | 4.1  | 63.35275 | 169.6 |
| S33-40-3  | 217.1 | -9.1  | 26.0 | -45.8198 | 165.1 |
| S33-40-2  | 269.0 | 60.5  | 11.4 | 19.80586 | 164.3 |
| S33-40-1  | 14.5  | 10.8  | 8.1  | 60.27224 | 164.0 |
| S33-39-2  | 261.3 | -9.0  | 8.6  | -9.77229 | 162.7 |
| S33-38-7  | 8.4   | 27.6  | 18.4 | 71.12087 | 156.0 |
| S33-38-5  | 165.3 | -61.0 | 15.2 | -74.5174 | 153.8 |
| S33-38-4  | 28.9  | 28.1  | 10.5 | 58.69347 | 153.3 |
| S33-38-2  | 89.4  | 84.0  | 1.4  | 31.26286 | 151.9 |
| S33-37-6  | 259.7 | -28.3 | 4.5  | -16.4964 | 147.8 |
| S33-37-5  | 267.8 | 35.7  | 1.5  | 8.511477 | 145.9 |
| S33-37-4  | 10.5  | 30.3  | 14.4 | 71.70566 | 144.9 |
| S33-37-3  | 122.9 | -59.0 | 13.6 | -43.8265 | 144.3 |
| S33-37-2  | 240.6 | -50.6 | 8.1  | -39.1063 | 143.9 |
| S33-35-20 | 8.2   | 23.8  | 2.7  | 69.12757 | 139.1 |
| S33-35-19 | 9.9   | 22.7  | 7.9  | 67.94143 | 137.6 |
| S33-35-18 | 359.2 | 10.8  | 10.0 | 63.5378  | 136.0 |
| S33-35-17 | 5.6   | 46.9  | 2.7  | 83.85084 | 135.8 |
| S33-35-16 | 1.9   | 26.7  | 3.5  | 72.13097 | 135.3 |
| S33-35-15 | 323.7 | 15.9  | 8.3  | 48.7541  | 135.0 |
| S33-35-14 | 18.2  | 23.4  | 11.4 | 64.1595  | 134.2 |
| S33-35-13 | 38.7  | 27.9  | 5.9  | 50.87186 | 133.5 |
| S33-35-12 | 5.3   | 23.6  | 8.6  | 69.82481 | 133.2 |
| S33-35-11 | 6.3   | 50.3  | 5.8  | 84.56252 | 133.1 |
| S33-35-10 | 352.1 | 56.9  | 4.3  | 81.43762 | 132.6 |
| S33-35-9  | 343.9 | 15.1  | 4.6  | 61.52232 | 131.2 |
| S33-35-8  | 356.8 | 61.9  | 10.5 | 78.49959 | 128.2 |
| S33-35-6  | 344.8 | 24.8  | 8.4  | 66.51984 | 126.3 |
| S33-35-5  | 357.4 | 33.2  | 7.9  | 76.01925 | 125.7 |
| S33-35-4  | 360.0 | 12.3  | 6.6  | 64.32168 | 124.7 |
| S33-35-2  | 354.7 | 64.1  | 5.3  | 75.47214 | 122.7 |
| S33-35-1  | 39.5  | 47.1  | 3.2  | 55.81935 | 122.4 |
| S33-34-3  | 350.0 | 75.9  | 4.7  | 57.9428  | 121.6 |
| S33-34-2  | 338.0 | -0.4  | 9.7  | 51.74875 | 121.3 |
| S33-34-1  | 66.3  | 30.3  | 14.1 | 28.40811 | 120.4 |
| S33-33-5  | 4.4   | -4.7  | 12.9 | 55.49238 | 118.0 |
| S33-33-3  | 324.0 | 10.5  | 13.3 | 47.11015 | 116.1 |
| S33-33-2  | 87.0  | -56.2 | 3.9  | -16.2973 | 115.6 |
| S33-33-1  | 356.4 | 55.2  | 6.7  | 85.14023 | 114.1 |
| S33-32-1  | 337.6 | 9.3   | 5.0  | 55.63097 | 113.0 |
| S33-31-1  | 356.7 | 57.1  | 5.9  | 83.59963 | 110.7 |
| S33-30-2  | 59.0  | 16.9  | 5.7  | 30.77437 | 104.8 |
| S33-29-2  | 349.9 | 4.0   | 7.0  | 58.62408 | 102.9 |

| Sample   | Ds    | Is    | MAD  | VGP      | Deep  |
|----------|-------|-------|------|----------|-------|
| S33-29-1 | 313.0 | 3.0   | 9.1  | 36.34465 | 102.2 |
| S33-28-6 | 324.7 | 26.1  | 5.7  | 53.00666 | 100.2 |
| S33-28-3 | 111.0 | -3.4  | 4.5  | -18.6509 | 97.7  |
| S33-28-2 | 342.8 | 14.5  | 7.0  | 60.70071 | 95.3  |
| S33-28-1 | 332.7 | 55.0  | 5.4  | 67.07847 | 95.0  |
| S33-27-5 | 291.7 | 20.0  | 17.2 | 23.79379 | 94.0  |
| S33-27-4 | 320.0 | 14.9  | 2.9  | 45.5907  | 93.7  |
| S33-27-3 | 277.3 | 15.5  | 4.4  | 10.33667 | 93.0  |
| S33-27-2 | 305.6 | 22.2  | 8.3  | 36.1483  | 92.0  |
| S33-27-1 | 43.0  | 61.2  | 5.5  | 54.57628 | 91.2  |
| S33-26-6 | 298.6 | 20.4  | 14.3 | 29.74583 | 91.0  |
| S33-26-5 | 45.4  | -20.8 | 18.6 | 29.1458  | 90.5  |
| S33-26-4 | 359.6 | 43.9  | 6.7  | 83.78516 | 90.2  |
| S33-26-3 | 6.8   | 19.4  | 10.3 | 67.2002  | 89.6  |
| S33-26-2 | 44.1  | 2.6   | 11.5 | 38.42626 | 89.2  |
| S33-26-1 | 29.9  | 13.0  | 2.6  | 52.34591 | 88.4  |
| S33-25-8 | 44.6  | 15.4  | 9.9  | 42.13926 | 87.8  |
| S33-25-7 | 78.6  | 51.8  | 5.6  | 25.1525  | 87.5  |
| S33-25-6 | 16.6  | 27.5  | 8.8  | 66.99399 | 87.2  |
| S33-25-5 | 334.7 | 59.9  | 8.2  | 67.87335 | 86.7  |
| S33-25-4 | 322.4 | 8.4   | 6.2  | 45.21182 | 86.0  |
| S33-25-2 | 18.6  | 16.1  | 6.7  | 60.67538 | 82.9  |
| S33-25-1 | 10.8  | 25.1  | 13.1 | 68.82291 | 82.6  |
| S33-24-4 | 6.4   | 13.9  | 8.4  | 64.44718 | 82.4  |
| S33-24-3 | 28.6  | 4.4   | 13.6 | 49.92009 | 82.3  |
| S33-24-2 | 345.7 | 3.9   | 8.7  | 57.16036 | 82.2  |
| S33-23-4 | 306.5 | 29.7  | 5.5  | 39.09097 | 81.6  |
| S33-23-3 | 275.1 | 48.0  | 5.1  | 18.81557 | 81.2  |
| S33-23-2 | 17.4  | 68.6  | 6.3  | 66.29992 | 80.9  |
| S33-23-1 | 82.8  | -76.7 | 8.2  | -25.6109 | 80.6  |
| S33-22-2 | 81.4  | 54.0  | 14.0 | 23.83845 | 75.4  |
| S33-22-1 | 300.6 | 4.0   | 11.5 | 26.76695 | 75.2  |
| S33-21-4 | 323.8 | 21.0  | 13.6 | 50.57101 | 73.3  |
| S33-21-3 | 34.6  | 51.7  | 7.4  | 60.82166 | 73.1  |
| S33-21-2 | 350.8 | 54.3  | 7.4  | 81.78041 | 72.8  |
| S33-20-1 | 348.8 | 13.4  | 5.3  | 62.8056  | 67.9  |
| S33-19-1 | 10.2  | 19.8  | 9.1  | 66.34199 | 66.8  |
| S33-18-1 | 341.6 | 19.8  | 10.4 | 62.42999 | 65.4  |
| S33-17-1 | 45.7  | 18.1  | 8.6  | 42.09806 | 64.6  |
| S33-16-3 | 300.1 | 33.7  | 8.8  | 34.8247  | 63.8  |
| S33-16-2 | 5.2   | 27.7  | 12.6 | 72.16515 | 63.7  |
| S33-16-1 | 315.7 | 24.3  | 8.7  | 45.1583  | 63.6  |
| S33-15-5 | 28.8  | 46.9  | 11.7 | 64.85023 | 62.9  |

| Sample    | Ds    | Is    | MAD  | VGP      | Deep |
|-----------|-------|-------|------|----------|------|
| S33-15-4  | 6.9   | 33.0  | 8.4  | 74.7574  | 62.6 |
| S33-15-3  | 29.8  | 65.0  | 11.6 | 62.73769 | 62.2 |
| S33-15-2  | 48.2  | 20.8  | 14.4 | 40.88427 | 62.1 |
| S33-15-1  | 52.4  | 13.3  | 13.3 | 35.2007  | 61.9 |
| S33-14-4  | 316.7 | 46.3  | 13.4 | 52.41352 | 61.5 |
| S33-14-3  | 25.2  | 67.3  | 13.7 | 63.92447 | 61.4 |
| S33-14-2  | 355.2 | 47.8  | 4.6  | 84.87216 | 61.3 |
| S33-12-9  | 266.8 | -46.4 | 6.2  | -16.7152 | 59.5 |
| S33-12-7  | 85.2  | 14.2  | 7.8  | 7.863137 | 58.5 |
| S33-12-5  | 35.0  | 43.2  | 9.4  | 58.65977 | 58.3 |
| S33-12-4  | 1.7   | 19.8  | 5.0  | 68.24766 | 58.1 |
| S33-12-3  | 39.4  | 58.3  | 10.4 | 57.3931  | 57.9 |
| S33-12-2  | 340.9 | 15.6  | 11.9 | 60.1801  | 57.5 |
| S33-11-21 | 337.6 | -30.9 | 4.6  | 36.90375 | 56.8 |
| S33-11-20 | 309.6 | 35.3  | 5.9  | 43.35239 | 56.4 |
| S33-11-19 | 11.4  | -24.2 | 11.8 | 44.11647 | 54.9 |
| S33-11-17 | 6.2   | 27.5  | 6.1  | 71.78686 | 54.6 |
| S33-11-16 | 2.6   | 27.8  | 6.0  | 72.70471 | 54.4 |
| S33-11-5  | 12.4  | -24.9 | 3.6  | 43.48996 | 54.1 |
| S33-11-3  | 326.1 | 45.0  | 14.9 | 60.06466 | 53.8 |
| S33-11-2  | 342.1 | 18.9  | 7.5  | 62.30799 | 53.6 |
| S33-11-1  | 345.8 | -21.1 | 8.1  | 45.07411 | 53.4 |
| S33-9-8   | 99.6  | 61.0  | 5.8  | 14.40734 | 52.5 |
| S33-9-7   | 171.2 | -49.1 | 13.7 | -82.2185 | 52.1 |
| S33-9-5   | 338.3 | -21.5 | 6.8  | 42.20785 | 51.8 |
| S33-9-4   | 293.9 | -52.6 | 5.0  | -0.07819 | 51.8 |
| S33-9-3   | 216.6 | -39.6 | 9.9  | -56.2841 | 51.2 |
| S33-9-2   | 255.6 | 7.4   | 24.6 | -10.1626 | 50.9 |
| S33-8-21  | 340.4 | 52.6  | 6.8  | 73.45162 | 50.0 |
| S33-8-19  | 281.7 | 56.5  | 6.8  | 27.12244 | 46.0 |
| S33-8-18  | 346.9 | 40.4  | 11.4 | 75.41351 | 45.6 |
| S33-8-17  | 292.1 | 14.6  | 8.5  | 22.64227 | 45.4 |
| S33-8-16  | 285.1 | 23.1  | 14.6 | -17.5606 | 45.2 |
| S33-8-13  | 345.4 | -6.9  | 5.6  | 52.01224 | 43.0 |
| S33-8-12  | 356.6 | -12.3 | 7.2  | 51.74066 | 42.7 |
| S33-8-11  | 10.5  | -18.5 | 11.8 | 47.40183 | 42.1 |
| S33-8-10  | 22.0  | -32.4 | 19.5 | 36.18977 | 41.2 |
| S33-8-9   | 24.8  | 3.3   | 8.2  | 51.77489 | 41.0 |
| S33-8-7   | 48.1  | -27.2 | 12.0 | 24.684   | 40.5 |
| S33-8-6   | 354.0 | -62.3 | 5.8  | 14.2986  | 40.2 |
| S33-8-5   | 15.8  | -1.3  | 9.5  | 54.17883 | 40.1 |
| S33-8-3   | 80.4  | 19.4  | 8.2  | 13.36028 | 39.9 |
| S33-8-1   | 299.8 | -81.4 | 5.3  | -22.5602 | 39.7 |

| Sample   | Ds    | Is    | MAD  | VGP      | Deep |
|----------|-------|-------|------|----------|------|
| S33-7-12 | 347.4 | -18.7 | 11.6 | 46.78002 | 39.4 |
| S33-7-11 | 85.6  | 23.5  | 11.3 | 10.13155 | 38.6 |
| S33-7-10 | 258.4 | -60.1 | 10.7 | -28.3959 | 38.4 |
| S33-7-9  | 259.7 | -15.1 | 14.3 | -12.7729 | 37.8 |
| S33-7-8  | 106.1 | 64.0  | 8.3  | 12.34974 | 37.3 |
| S33-7-7  | 194.6 | -3.8  | 8.8  | -56.9973 | 36.9 |
| S33-7-5  | 232.9 | 4.8   | 16.9 | -29.3069 | 36.6 |
| S33-7-3  | 208.6 | -44.9 | 8.9  | -64.5313 | 36.2 |
| S33-7-2  | 97.9  | -1.4  | 8.6  | -7.07305 | 35.9 |
| S33-7-1  | 338.7 | -7.4  | 3.9  | 49.03175 | 29.4 |
| S33-5-11 | 249.2 | -50.9 | 11.8 | -32.2544 | 26.5 |
| S33-5-9  | 32.9  | 50.2  | 12.7 | 62.02097 | 26.1 |
| S33-5-8  | 18.6  | 20.0  | 12.9 | 62.40456 | 25.8 |
| S33-5-7  | 352.9 | 13.7  | 8.0  | 64.18557 | 25.4 |
| S33-5-6  | 52.0  | 47.2  | 9.5  | 45.31527 | 25.1 |
| S33-5-4  | 350.6 | 51.3  | 11.1 | 82.02485 | 24.7 |
| S33-5-2  | 62.1  | 11.0  | 12.2 | 26.52026 | 24.5 |
| S33-5-1  | 327.7 | 65.6  | 8.4  | 60.87342 | 23.8 |
| S33-3-4  | 356.5 | -0.2  | 10.4 | 57.8292  | 16.8 |
| S33-3-2  | 331.7 | 19.6  | 7.3  | 55.95057 | 10.3 |
| S33-2-4  | 351.6 | 45.7  | 8.6  | 81.27579 | 8.7  |
| S33-2-3  | 291.5 | 34.9  | 11.7 | 27.89343 | 8.5  |
| S33-2-2  | 320.9 | 19.8  | 12.4 | 47.90544 | 8.2  |
| S33-2-1  | 329.1 | 7.5   | 13.4 | 49.60631 | 7.9  |
| S33-1-2  | 180.5 | -13.3 | 5.0  | -64.8365 | 5.5  |
| S33-1-1  | 19.6  | 43.8  | 13.8 | 71.73864 | 3.9  |

**Supplementary Table S2 Spirite isotope data**

| Sample |                         |                         |          | Sample |                         |                         |          |
|--------|-------------------------|-------------------------|----------|--------|-------------------------|-------------------------|----------|
| ID     | $\delta^{13}\text{C}_c$ | $\delta^{18}\text{O}_c$ | position | ID     | $\delta^{13}\text{C}_c$ | $\delta^{18}\text{O}_c$ | position |
| 3-1-2  | 0.4                     | -20.8                   | 11.3     | 37-4-2 | 0.5                     | -12.6                   | 145.5    |
| 3-1-3  | -0.6                    | -16.6                   | 11.3     | 37-4-1 | 0.9                     | -14.2                   | 145.5    |
| 31-3   | -3.22                   | -9.59                   | 11.3     | 37-4   | -1.70                   | -10.98                  | 145.5    |
| 3-1-1  | -1.5                    | -15.6                   | 11.3     | 37-5   | -2.26                   | -9.34                   | 148.9    |
| 3-1    | -0.10                   | -14.99                  | 11.3     | 39-1-2 | -2.2                    | -14.0                   | 160.9    |
| 3-2    | -1.03                   | -17.73                  | 11.8     | 39-1-1 | -4.2                    | -11.6                   | 160.9    |
| 4-1    | -1.10                   | -17.71                  | 17.6     | 39-1   | -5.68                   | -7.09                   | 160.9    |
| 4-2    | 0.01                    | -17.80                  | 18.0     | 40-4   | -3.42                   | -5.56                   | 166.1    |
| 4-3    | 0.39                    | -18.41                  | 18.9     | 41-1   | -3.55                   | -6.58                   | 169.6    |
| 4-3-2  | 0.5                     | -18.9                   | 18.9     | 41-2   | -3.29                   | -7.27                   | 171.1    |
| 4-3-1  | 0.1                     | -14.9                   | 18.9     | 43-2-2 | -2.2                    | -7.6                    | 181.7    |
| 5-1    | -0.29                   | -16.16                  | 24.2     | 43-2-1 | -1.3                    | -14.2                   | 181.7    |
| 5-2    | 0.60                    | -16.37                  | 26.9     | 44-2   | -3.71                   | -6.68                   | 182.7    |
| 6-1    | -1.58                   | -17.23                  | 28.0     | 45-1   | -2.77                   | -11.71                  | 184.4    |
| 7-1    | 1.68                    | -16.75                  | 30.8     | 45-3   | -3.80                   | -8.09                   | 187.6    |
| 8-1    | -0.97                   | -17.49                  | 40.9     | 47-1   | -4.49                   | -7.53                   | 188.6    |
| 8-2    | -0.44                   | -17.84                  | 42.7     | 48-2-1 | -2.4                    | -13.8                   | 191.8    |
| 8-3    | 0.60                    | -15.73                  | 43.4     | 48-1   | -4.65                   | -5.39                   | 191.8    |
| 8-4    | 0.29                    | -15.37                  | 49.6     | 50-1   | -3.94                   | -6.28                   | 196.1    |
| 9-1    | -0.25                   | -16.66                  | 52.0     | 52-3   | -2.43                   | -14.23                  | 202.1    |
| 9-2    | 1.06                    | -13.82                  | 52.2     | 56-2   | -3.44                   | -6.22                   | 211.9    |
| 11-1   | -0.18                   | -16.98                  | 53.5     | 57-1   | -2.18                   | -8.59                   | 217.5    |
| 11-2   | 1.06                    | -16.57                  | 53.9     | 59-1   | -4.41                   | -13.29                  | 219.4    |
| 11-3   | 1.66                    | -17.55                  | 55.6     | 61-2   | -2.70                   | -8.08                   | 228.5    |
| 11-4   | 1.40                    | -16.28                  | 57.1     | 61-5   | -4.25                   | -7.41                   | 230.8    |
| 15-1   | -1.17                   | -16.46                  | 62.0     | 64-1   | -2.88                   | -8.73                   | 237.1    |
| 17-1   | -2.32                   | -15.21                  | 64.3     | 64-2   | -3.30                   | -6.27                   | 237.6    |
| 21-1   | -3.51                   | -14.33                  | 72.0     | 64-4   | -3.43                   | -6.58                   | 238.4    |
| 22-1   | -3.71                   | -14.79                  | 75.0     | 64-5   | -3.13                   | -6.28                   | 239.5    |
| 23-1   | -3.81                   | -14.08                  | 79.0     | 65-1-2 | -1.5                    | -12.8                   | 241.1    |
| 25-2-2 | -2.5                    | -12.2                   | 82.9     | 65-2   | -3.23                   | -5.43                   | 242.2    |
| 25-1-1 | -2.1                    | -13.5                   | 82.9     | 65-3   | -1.64                   | -7.86                   | 244.3    |
| 25-1   | -0.29                   | -15.95                  | 82.9     | 67-1-3 | -0.7                    | -13.4                   | 252.7    |
| 27-1   | -2.29                   | -9.73                   | 92.0     | 67-1-2 | -1.2                    | -13.5                   | 252.7    |
| 27-3   | -2.41                   | -9.41                   | 94.3     | 67-1-1 | -1.3                    | -11.9                   | 252.7    |
| 28-2-3 | -2.3                    | -10.0                   | 96.0     | 69-3   | -3.22                   | -9.85                   | 258.9    |
| 28-2-2 | -2.8                    | -11.9                   | 96.0     | 73-1   | -3.12                   | -8.34                   | 265.9    |
| 28-2-1 | -2.5                    | -12.0                   | 96.0     | 74-1   | -4.34                   | -10.43                  | 270.1    |
| 28-2   | -3.27                   | -8.78                   | 96.0     | 74-2-1 | -1.0                    | -11.4                   | 272.5    |
| 28-3   | -2.20                   | -11.36                  | 100.2    | 75-1   | -4.21                   | -6.25                   | 273.8    |
| 28-4   | -2.27                   | -11.54                  | 100.6    | 75-3   | -3.91                   | -6.20                   | 277.8    |

| Sample |                         |                         |          | Sample |                         |                         |          |
|--------|-------------------------|-------------------------|----------|--------|-------------------------|-------------------------|----------|
| ID     | $\delta^{13}\text{C}_c$ | $\delta^{18}\text{O}_c$ | position | ID     | $\delta^{13}\text{C}_c$ | $\delta^{18}\text{O}_c$ | position |
| 29-1-3 | 0.3                     | -14.9                   | 102.5    | 76-1   | -2.8                    | -7.5                    | 279.2    |
| 29-1-2 | 0.5                     | -14.2                   | 102.5    | 76-1   | -3.12                   | -5.30                   | 279.2    |
| 29-1-1 | 0.7                     | -13.9                   | 102.5    | 76-2   | -0.47                   | -6.83                   | 281.1    |
| 29-1   | -2.26                   | -15.15                  | 102.5    | 76-4-2 | -2.5                    | -7.6                    | 282.3    |
| 30-1   | -2.32                   | -10.36                  | 106.5    | 76-4-1 | -2.1                    | -12.8                   | 282.3    |
| 31-1   | -3.36                   | -9.41                   | 110.1    | 76-4   | -0.79                   | -7.96                   | 282.3    |
| 32-1   | -3.63                   | -7.99                   | 112.9    | 76-5   | -2.55                   | -8.29                   | 283.0    |
| 33-1   | -5.24                   | -7.87                   | 114.1    | 78-1-2 | -0.6                    | -7.1                    | 288.2    |
| 33-2   | -4.34                   | -6.92                   | 116.1    | 78-1-1 | -6.2                    | -10.4                   | 288.2    |
| 33-3   | -3.83                   | -7.80                   | 116.7    | 79-1   | -3.88                   | -10.57                  | 289.8    |
| 33-4   | -2.96                   | -7.87                   | 117.7    | 80-1   | -3.72                   | -8.68                   | 291.9    |
| 34-1   | -2.53                   | -9.71                   | 121.5    | 81-2   | -3.18                   | -7.07                   | 297.0    |
| 35-2   | -4.48                   | -7.65                   | 122.8    | 81-3   | -3.99                   | -6.33                   | 297.7    |
| 35-4   | -3.49                   | -9.84                   | 125.1    | 82-2-1 | -2.2                    | -10.7                   | 305.9    |
| 35-6   | -4.39                   | -5.54                   | 130.6    | 82-3   | -2.24                   | -5.40                   | 307.6    |
| 35-8-1 | -4.5                    | -12.7                   | 132.9    | 84-1-2 | -3.5                    | -7.0                    | 314.6    |
| 35-9   | -3.25                   | -8.47                   | 135.1    | 84-1-1 | -3.7                    | -6.2                    | 314.6    |
| 35-10  | -2.91                   | -9.18                   | 135.4    | 84-2   | -2.83                   | -6.61                   | 320.0    |
| 36-1   | -2.40                   | -8.55                   | 136.6    | 86-1   | -2.83                   | -8.17                   | 326.3    |
| 37-2   | -2.14                   | -5.58                   | 143.0    | 86-2   | -5.34                   | -6.03                   | 326.7    |
| 37-3   | -2.81                   | -8.81                   | 144.5    | 86-3   | -5.2                    | -6.7                    | 327.3    |



**Supplementary Table S3 Micrite isotope data**

| Sample ID | $\delta^{13}\text{C}_c$ | $\delta^{18}\text{O}_c$ | $\delta^{18}\text{O}_{\text{PDB}}$<br>(20) | $\delta^{18}\text{O}_{\text{PDB}}$<br>(30) | $\delta^{18}\text{O}_{\text{sw}}$<br>(20) | $\delta^{18}\text{O}_{\text{sw}}$<br>(30) | position |
|-----------|-------------------------|-------------------------|--------------------------------------------|--------------------------------------------|-------------------------------------------|-------------------------------------------|----------|
| 86-3      | -5.2                    | -5.4                    | -33.9                                      | -31.9                                      | -4.0                                      | -2.0                                      | 327.3    |
| 85-1      | -3.6                    | -6.9                    | -35.3                                      | -33.4                                      | -5.5                                      | -3.5                                      | 320.9    |
| 84-1      | -3.3                    | -5.9                    | -34.4                                      | -32.4                                      | -4.5                                      | -2.5                                      | 314.6    |
| 83-2      | -2.2                    | -4.8                    | -33.3                                      | -31.4                                      | -3.4                                      | -1.4                                      | 313.9    |
| 83-1      | -2.0                    | -3.8                    | -32.4                                      | -30.4                                      | -2.4                                      | -0.4                                      | 305.9    |
| 82-2-2    | -2.9                    | -3.9                    | -32.5                                      | -30.5                                      | -2.6                                      | -0.6                                      | 305.9    |
| 82-2      | -3.3                    | -3.7                    | -32.3                                      | -30.3                                      | -2.4                                      | -0.4                                      | 305.9    |
| 82-1      | -4.1                    | -4.8                    | -33.4                                      | -31.4                                      | -3.5                                      | -1.5                                      | 305.2    |
| 81-5      | -4.1                    | -5.0                    | -33.6                                      | -31.6                                      | -3.7                                      | -1.7                                      | 303.9    |
| 81-4      | -4.6                    | -3.9                    | -32.5                                      | -30.5                                      | -2.6                                      | -0.6                                      | 303.2    |
| 78-1      | -4.2                    | -4.5                    | -33.1                                      | -31.1                                      | -3.2                                      | -1.2                                      | 288.2    |
| 77-2      | -1.5                    | -3.5                    | -32.0                                      | -30.1                                      | -2.1                                      | -0.1                                      | 287.3    |
| 77-1      | -2.6                    | -3.8                    | -32.3                                      | -30.4                                      | -2.4                                      | -0.4                                      | 286.1    |
| 76-3      | -2.7                    | -4.1                    | -32.6                                      | -30.7                                      | -2.7                                      | -0.7                                      | 281.8    |
| 75-2      | -4.4                    | -5.7                    | -34.2                                      | -32.2                                      | -4.3                                      | -2.3                                      | 277.2    |
| 74-2-2    | -1.1                    | -5.5                    | -34.0                                      | -32.0                                      | -4.1                                      | -2.1                                      | 272.5    |
| 72-1      | -3.1                    | -4.7                    | -33.3                                      | -31.3                                      | -3.4                                      | -1.4                                      | 263.5    |
| 71-1      | -2.4                    | -5.9                    | -34.4                                      | -32.4                                      | -4.5                                      | -2.5                                      | 262.2    |
| 70-1-1    | -4.1                    | -4.7                    | -33.2                                      | -31.3                                      | -3.3                                      | -1.3                                      | 261.0    |
| 70-1      | -3.5                    | -5.0                    | -33.5                                      | -31.6                                      | -3.7                                      | -1.7                                      | 261.00   |
| 69-1      | -3.9                    | -5.6                    | -34.1                                      | -32.2                                      | -4.3                                      | -2.3                                      | 256.4    |
| 68-1      | -5.0                    | -6.4                    | -34.9                                      | -32.9                                      | -5.0                                      | -3.0                                      | 253.3    |
| 67-1-4    | -4.2                    | -4.3                    | -32.9                                      | -30.9                                      | -3.0                                      | -1.0                                      | 252.7    |
| 67-1      | -3.9                    | -4.4                    | -32.9                                      | -30.9                                      | -3.0                                      | -1.0                                      | 252.7    |
| 66-1      | -4.1                    | -5.5                    | -34.0                                      | -32.1                                      | -4.1                                      | -2.1                                      | 245.5    |
| 65-1-3    | -2.4                    | -2.1                    | -30.7                                      | -28.8                                      | -0.8                                      | 1.3                                       | 241.1    |
| 65-1-1    | -2.6                    | -4.1                    | -32.6                                      | -30.7                                      | -2.7                                      | -0.7                                      | 241.1    |
| 65-1      | -2.6                    | -3.7                    | -32.2                                      | -30.3                                      | -2.3                                      | -0.3                                      | 241.1    |
| 64-3      | -3.6                    | -5.5                    | -34.0                                      | -32.1                                      | -4.1                                      | -2.1                                      | 237.8    |
| 63-1      | -4.0                    | -6.4                    | -34.8                                      | -32.9                                      | -5.0                                      | -3.0                                      | 235.4    |
| 62-1      | -4.3                    | -6.4                    | -34.9                                      | -33.0                                      | -5.1                                      | -3.1                                      | 232.9    |
| 60-2      | -3.8                    | -6.5                    | -35.0                                      | -33.0                                      | -5.2                                      | -3.2                                      | 226.1    |
| 59-3      | -4.3                    | -6.2                    | -34.7                                      | -32.8                                      | -4.9                                      | -2.9                                      | 221.6    |
| 57-2      | -3.9                    | -6.4                    | -34.9                                      | -32.9                                      | -5.0                                      | -3.0                                      | 217.5    |
| 56-4      | -3.4                    | -6.2                    | -34.7                                      | -32.7                                      | -4.8                                      | -2.8                                      | 215.4    |
| 55-1      | -3.9                    | -6.0                    | -34.5                                      | -32.5                                      | -4.6                                      | -2.6                                      | 208.8    |
| 54-1      | -2.5                    | -5.5                    | -34.0                                      | -32.1                                      | -4.2                                      | -2.2                                      | 208.1    |
| 53-1      | -4.2                    | -6.6                    | -35.1                                      | -33.2                                      | -5.3                                      | -3.3                                      | 206.1    |
| 52-1      | -3.6                    | -6.0                    | -34.5                                      | -32.5                                      | -4.6                                      | -2.6                                      | 200.2    |
| 51-1      | -3.7                    | -6.1                    | -34.5                                      | -32.6                                      | -4.7                                      | -2.7                                      | 197.8    |
| 50-1      | -3.9                    | -6.2                    | -34.7                                      | -32.8                                      | -4.9                                      | -2.9                                      | 196.1    |

| Sample ID | $\delta^{13}\text{C}_c$ | $\delta^{18}\text{O}_c$ | $\delta^{18}\text{O}_{\text{PDB}}$<br>(20) | $\delta^{18}\text{O}_{\text{PDB}}$<br>(30) | $\delta^{18}\text{O}_{\text{sw}}$<br>(20) | $\delta^{18}\text{O}_{\text{sw}}$<br>(30) | position |
|-----------|-------------------------|-------------------------|--------------------------------------------|--------------------------------------------|-------------------------------------------|-------------------------------------------|----------|
| 49-2      | -2.8                    | -5.4                    | -33.9                                      | -32.0                                      | -4.1                                      | -2.1                                      | 194.5    |
| 48-2-2    | -4.9                    | -4.5                    | -33.1                                      | -31.1                                      | -3.2                                      | -1.2                                      | 191.8    |
| 45-1      | -4.6                    | -6.7                    | -35.2                                      | -33.2                                      | -5.3                                      | -3.3                                      | 184.4    |
| 44-1      | -3.8                    | -4.0                    | -32.5                                      | -30.6                                      | -2.6                                      | -0.6                                      | 182.2    |
| 43-1      | -3.8                    | -5.4                    | -33.9                                      | -32.0                                      | -4.0                                      | -2.0                                      | 181.7    |
| 42-2      | -3.4                    | -4.7                    | -33.2                                      | -31.3                                      | -3.3                                      | -1.3                                      | 175.3    |
| 42-1      | -5.0                    | -3.8                    | -32.4                                      | -30.4                                      | -2.4                                      | -0.4                                      | 174.5    |
| 41-3      | -4.1                    | -5.9                    | -34.4                                      | -32.4                                      | -4.5                                      | -2.5                                      | 174.0    |
| 40-2      | -3.8                    | -5.5                    | -34.0                                      | -32.1                                      | -4.2                                      | -2.2                                      | 164.2    |
| 39-1-3    | -5.7                    | -6.9                    | -35.3                                      | -33.4                                      | -5.5                                      | -3.5                                      | 160.9    |
| 38-4      | -3.5                    | -3.8                    | -32.3                                      | -30.4                                      | -2.4                                      | -0.4                                      | 157.4    |
| 38-1      | -5.3                    | -4.8                    | -33.3                                      | -31.4                                      | -3.5                                      | -1.4                                      | 151.4    |
| 37-1      | -4.1                    | -4.5                    | -33.0                                      | -31.1                                      | -3.1                                      | -1.1                                      | 141.5    |
| 37-1      | -2.5                    | -4.5                    | -33.0                                      | -31.0                                      | -3.1                                      | -1.1                                      | 141.5    |
| 36-2      | -3.2                    | -6.2                    | -34.7                                      | -32.7                                      | -4.9                                      | -2.9                                      | 138.4    |
| 35-8-2    | -4.9                    | -4.0                    | -32.5                                      | -30.6                                      | -2.6                                      | -0.6                                      | 132.9    |
| 35-8      | -5.0                    | -5.0                    | -33.5                                      | -31.5                                      | -3.6                                      | -1.6                                      | 132.9    |
| average   | -3.7                    | -5.1                    | -33.6                                      | -31.7                                      | -3.8                                      | -1.8                                      |          |

### Supplementary Figure S1

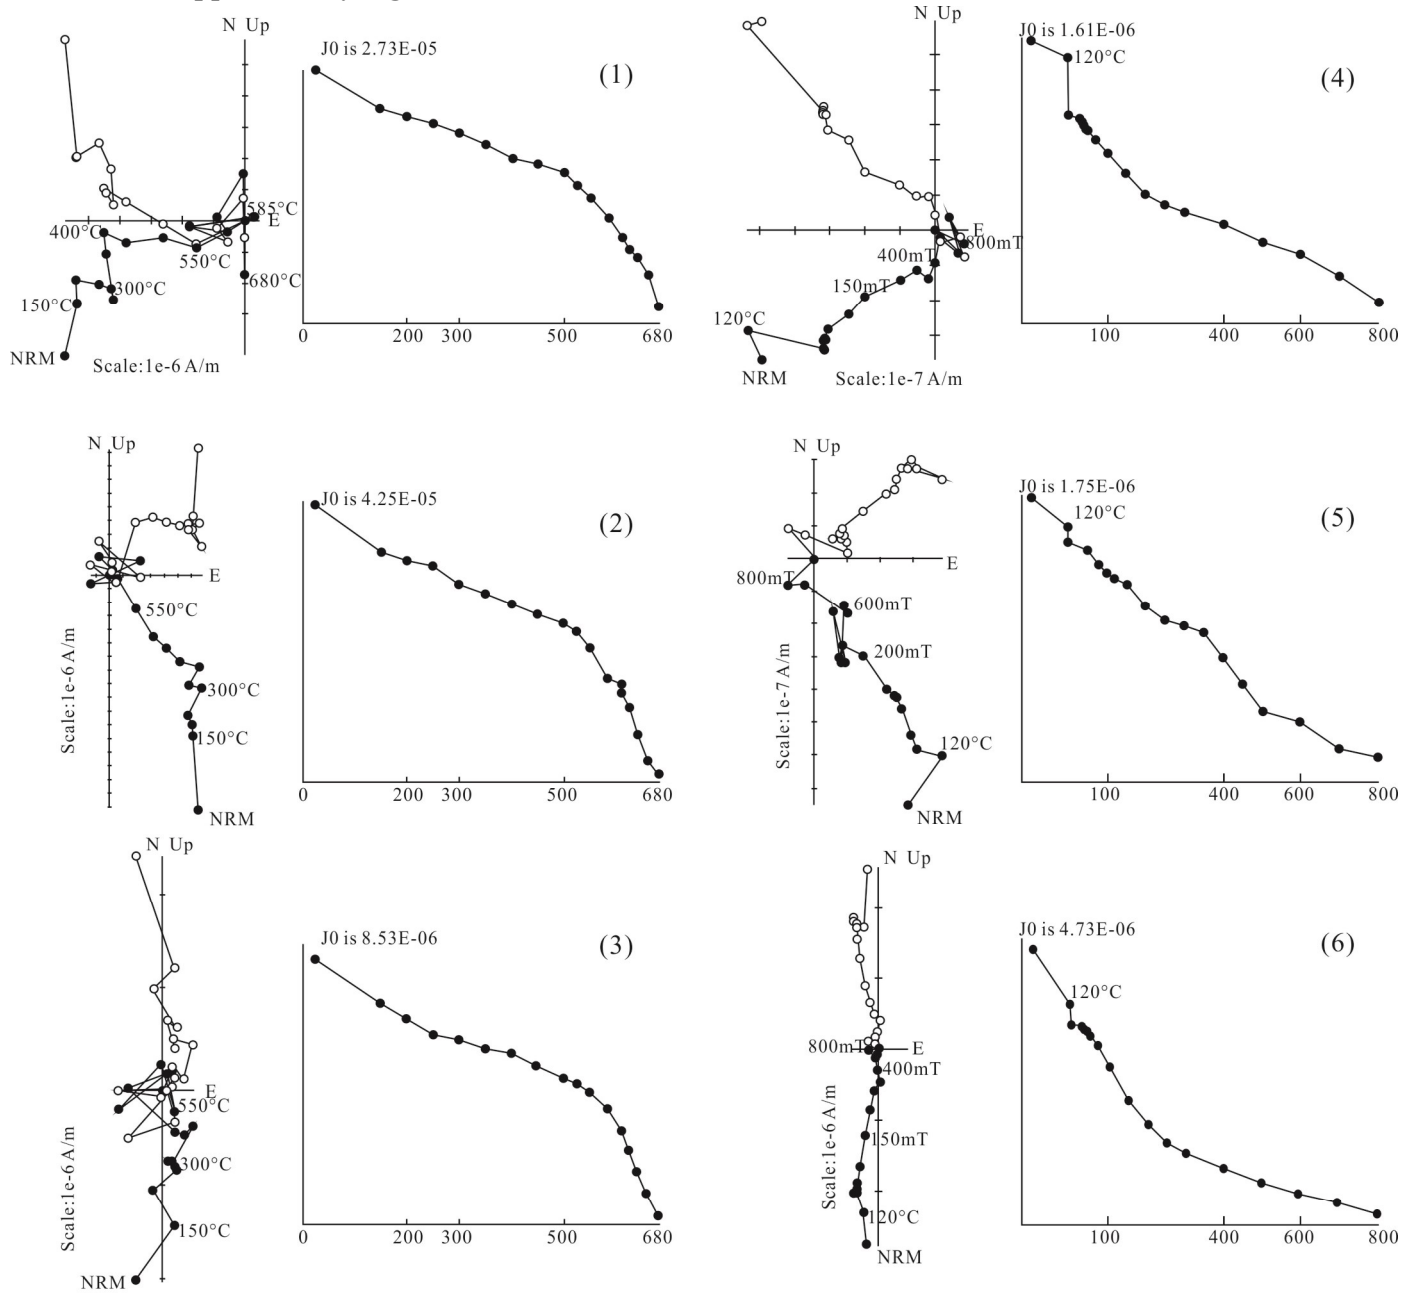

- Declination
- Inclination

Stepwise thermal demagnetization (1-3) and alternating demagnetization (4-6) diagrams in-situ of representative samples from the Gerze section.

Figure S1 Typical demagnetization curves
